# Supplementary material for: Social cognition, behaviour and therapy adherence in frontal lobe epilepsy: a study combining neuroeconomic and neuropsychological methods
Source: R Soc Open Sci. 2019 Aug 28;6(8):180850. doi: 10.1098/rsos.180850 (PMC6731699; doi:10.1098/rsos.180850)
Supplement: Dataset - Javor et al. 2019 - Social cognition, behaviour, and therapy adherence in frontal lobe epilepsy: A study combining neuroeconomic and neuropsychological methods [file rsos180850supp1.xlsx]

## Sheet: Tabelle1
Participant number	Group (patient=1, control=0)	Gender (female=0, male=1)	Age	Cooperative behavior Game 1	Cooperative behavior Game 2	Cooperative behavior Game 3	Cooperative behavior Game 4	Cooperative behavior total
1	1	0	23	16	8	6	3	33
2	1	0	46	16	13	11	8	48
3	1	0	29	15	10	12	15	52
4	1	0	40	12	10	9	7	38
5	1	0	47	21	13	7	6	47
6	1	0	37	31	32	30	24	117
7	1	0	46	17	10	8	7	42
8	1	0	29	18	15	23	19	75
9	1	1	31	16	6	4	3	29
10	1	1	43	32	32	31	32	127
11	1	1	23	23	22	20	24	89
12	1	1	39	32	32	31	32	127
13	1	1	41	14	15	11	12	52
14	1	1	30	16	11	10	12	49
15	1	1	36	32	32	32	32	128
16	0	0	34	23	18	17	20	78
17	0	0	29	6	3	0	0	9
18	0	0	41	14	9	2	3	28
19	0	0	40	12	1	0	0	13
20	0	0	27	5	4	4	3	16
21	0	0	28	15	8	8	2	33
22	0	0	29	18	18	23	2	61
23	0	0	31	14	10	9	4	37
24	0	1	44	8	5	6	3	22
25	0	1	33	11	9	7	9	36
26	0	1	33	2	6	5	14	27
27	0	1	28	8	9	8	6	31
28	0	1	30	9	9	9	6	33
29	0	1	43	14	10	9	4	37
30	0	1	41	15	9	4	1	29
